# Supplementary material
Source: ML conference proceedings conference paper supplement (https://openaccess.thecvf.com/content/CVPR2024/html/Khan_Consistency_and_Uncertainty_CVPR_2024_paper.html)
Supplement: Supplementary file 1 [file Khan_Consistency_and_Uncertainty_CVPR_2024_supplemental.pdf]

**Consistency and Uncertainty: Identifying Unreliable Responses From Black-Box  
Vision-Language Models for Selective Visual Question Answering**

Supplementary Material

| $f_{BB}$<br>Risk | BLIP |     |             |             |             |             |             |            |             |            | ALBEF       |             |             |             |             |             |            |             |            |            |
|------------------|------|-----|-------------|-------------|-------------|-------------|-------------|------------|-------------|------------|-------------|-------------|-------------|-------------|-------------|-------------|------------|-------------|------------|------------|
|                  | 0.0  | 5.0 | 10.0        | 15.0        | 20.0        | 25.0        | 30.0        | 35.0       | 40.0        | 45.0       | 0.0         | 5.0         | 10.0        | 15.0        | 20.0        | 25.0        | 30.0       | 35.0        | 40.0       | 45.0       |
| Consistency      |      |     |             |             |             |             |             |            |             |            |             |             |             |             |             |             |            |             |            |            |
| $n \geq 0$       | 0.0  | 0.0 | 0.11        | 0.18        | 0.25        | 0.32        | 0.4         | 0.49       | 0.61        | 0.77       | 0.02        | 0.03        | 0.08        | 0.14        | 0.21        | 0.3         | 0.41       | 0.53        | 0.68       | 0.85       |
| $n \geq 1$       | 0.0  | 0.0 | 0.13        | 0.22        | 0.3         | 0.38        | 0.47        | 0.59       | 0.74        | 0.89       | 0.02        | 0.04        | 0.1         | 0.18        | 0.29        | 0.4         | 0.52       | 0.66        | 0.83       | 0.97       |
| $n \geq 2$       | 0.0  | 0.0 | 0.14        | 0.23        | 0.33        | 0.42        | 0.51        | 0.63       | 0.78        | 0.94       | 0.03        | 0.04        | 0.1         | 0.21        | 0.32        | 0.45        | 0.59       | 0.73        | 0.89       | <b>1.0</b> |
| $n \geq 3$       | 0.0  | 0.0 | 0.16        | 0.26        | 0.37        | 0.45        | 0.56        | 0.68       | 0.84        | <b>1.0</b> | 0.03        | 0.05        | 0.12        | 0.23        | 0.37        | 0.51        | 0.66       | 0.83        | 0.97       | <b>1.0</b> |
| $n \geq 4$       | 0.0  | 0.0 | 0.18        | 0.28        | 0.38        | 0.48        | 0.59        | 0.74       | 0.88        | <b>1.0</b> | <b>0.04</b> | <b>0.06</b> | <b>0.13</b> | 0.26        | 0.42        | 0.55        | 0.71       | 0.88        | <b>1.0</b> | <b>1.0</b> |
| $n \geq 5$       | 0.0  | 0.0 | <b>0.19</b> | <b>0.31</b> | <b>0.44</b> | <b>0.54</b> | <b>0.65</b> | <b>0.8</b> | <b>0.95</b> | <b>1.0</b> | <b>0.04</b> | <b>0.06</b> | 0.11        | <b>0.33</b> | <b>0.47</b> | <b>0.63</b> | <b>0.8</b> | <b>0.93</b> | <b>1.0</b> | <b>1.0</b> |

Table 1. More granular risk-coverage data for OK-VQA.

| $f_{BB}$<br>Risk | BLIP |             |             |             |             |            |             |            |            |             | ALBEF       |             |             |            |            |             |            |      |  |  |
|------------------|------|-------------|-------------|-------------|-------------|------------|-------------|------------|------------|-------------|-------------|-------------|-------------|------------|------------|-------------|------------|------|--|--|
|                  | 20.0 | 25.0        | 30.0        | 35.0        | 40.0        | 45.0       | 50.0        | 55.0       | 56.0       | 20.0        | 25.0        | 30.0        | 35.0        | 40.0       | 45.0       | 50.0        | 55.0       | 60.0 |  |  |
| Consistency      |      |             |             |             |             |            |             |            |            |             |             |             |             |            |            |             |            |      |  |  |
| $n \geq 0$       | 0.01 | <b>0.04</b> | 0.09        | 0.23        | 0.51        | 0.69       | 0.83        | 0.95       | 0.98       | 0.0         | 0.04        | 0.07        | 0.12        | 0.24       | 0.46       | 0.75        | 0.92       | 1.0  |  |  |
| $n \geq 1$       | 0.01 | <b>0.04</b> | <b>0.11</b> | <b>0.27</b> | 0.58        | 0.76       | 0.9         | <b>1.0</b> | <b>1.0</b> | 0.01        | 0.05        | 0.09        | 0.15        | 0.29       | 0.55       | 0.86        | <b>1.0</b> | 1.0  |  |  |
| $n \geq 2$       | 0.01 | <b>0.04</b> | 0.1         | 0.25        | <b>0.61</b> | 0.79       | <b>0.93</b> | <b>1.0</b> | <b>1.0</b> | 0.01        | 0.05        | 0.09        | 0.15        | <b>0.3</b> | 0.59       | <b>0.89</b> | <b>1.0</b> | 1.0  |  |  |
| $n \geq 3$       | 0.01 | <b>0.04</b> | 0.1         | 0.25        | 0.58        | <b>0.8</b> | <b>0.93</b> | <b>1.0</b> | <b>1.0</b> | 0.02        | 0.06        | 0.11        | 0.17        | <b>0.3</b> | <b>0.6</b> | <b>0.89</b> | <b>1.0</b> | 1.0  |  |  |
| $n \geq 4$       | 0.01 | 0.02        | 0.08        | 0.24        | 0.55        | 0.77       | 0.92        | <b>1.0</b> | <b>1.0</b> | 0.02        | 0.06        | 0.11        | 0.16        | <b>0.3</b> | <b>0.6</b> | 0.87        | <b>1.0</b> | 1.0  |  |  |
| $n \geq 5$       | 0.01 | 0.01        | 0.04        | <b>0.27</b> | 0.53        | 0.72       | 0.87        | <b>1.0</b> | <b>1.0</b> | <b>0.04</b> | <b>0.07</b> | <b>0.12</b> | <b>0.18</b> | 0.27       | 0.53       | 0.84        | <b>1.0</b> | 1.0  |  |  |

Table 2. More granular risk-coverage data for AdVQA.

| $f_{BB}$<br>risk | BLIP |            |             |             |             |             |             |             |             |            |            |            |            |            |            |  |
|------------------|------|------------|-------------|-------------|-------------|-------------|-------------|-------------|-------------|------------|------------|------------|------------|------------|------------|--|
|                  | 0.0  | 1.0        | 2.0         | 3.0         | 4.0         | 5.0         | 6.0         | 7.0         | 8.0         | 9.0        | 10.0       | 11.0       | 12.0       | 13.0       | 14.0       |  |
| Consistency      |      |            |             |             |             |             |             |             |             |            |            |            |            |            |            |  |
| $n \geq 0$       | 0.01 | 0.55       | 0.63        | 0.69        | 0.74        | 0.77        | 0.8         | 0.82        | 0.85        | 0.88       | 0.9        | 0.91       | 0.93       | 0.95       | 0.97       |  |
| $n \geq 1$       | 0.01 | 0.6        | 0.69        | 0.76        | 0.8         | 0.83        | 0.86        | 0.9         | 0.92        | 0.94       | 0.96       | 0.98       | 0.99       | <b>1.0</b> | <b>1.0</b> |  |
| $n \geq 2$       | 0.01 | 0.63       | 0.72        | 0.78        | 0.83        | 0.86        | 0.89        | 0.92        | 0.94        | 0.96       | 0.98       | <b>1.0</b> | <b>1.0</b> | <b>1.0</b> | <b>1.0</b> |  |
| $n \geq 3$       | 0.01 | 0.66       | 0.75        | 0.81        | 0.85        | 0.88        | 0.92        | 0.94        | 0.96        | 0.98       | <b>1.0</b> | <b>1.0</b> | <b>1.0</b> | <b>1.0</b> | <b>1.0</b> |  |
| $n \geq 4$       | 0.01 | 0.68       | 0.77        | 0.83        | 0.87        | 0.91        | 0.93        | <b>0.96</b> | 0.98        | 0.99       | <b>1.0</b> | <b>1.0</b> | <b>1.0</b> | <b>1.0</b> | <b>1.0</b> |  |
| $n \geq 5$       | 0.01 | <b>0.7</b> | <b>0.79</b> | <b>0.84</b> | <b>0.88</b> | <b>0.92</b> | <b>0.94</b> | <b>0.96</b> | <b>0.99</b> | <b>1.0</b> | <b>1.0</b> | <b>1.0</b> | <b>1.0</b> | <b>1.0</b> | <b>1.0</b> |  |

Table 3. Granular risk-coverage data for VQAv2 with BLIP as  $f_{BB}$ .

| $f_{BB}$<br>risk | ALBEF |            |             |             |             |             |             |             |             |            |            |            |            |            |            |  |
|------------------|-------|------------|-------------|-------------|-------------|-------------|-------------|-------------|-------------|------------|------------|------------|------------|------------|------------|--|
|                  | 0.0   | 1.0        | 2.0         | 3.0         | 4.0         | 5.0         | 6.0         | 7.0         | 8.0         | 9.0        | 10.0       | 11.0       | 12.0       | 13.0       | 14.0       |  |
| Consistency      |       |            |             |             |             |             |             |             |             |            |            |            |            |            |            |  |
| $n \geq 0$       | 0.01  | 0.55       | 0.63        | 0.69        | 0.74        | 0.77        | 0.8         | 0.82        | 0.85        | 0.88       | 0.9        | 0.91       | 0.93       | 0.95       | 0.97       |  |
| $n \geq 1$       | 0.01  | 0.6        | 0.69        | 0.76        | 0.8         | 0.83        | 0.86        | 0.9         | 0.92        | 0.94       | 0.96       | 0.98       | 0.99       | <b>1.0</b> | <b>1.0</b> |  |
| $n \geq 2$       | 0.01  | 0.63       | 0.72        | 0.78        | 0.83        | 0.86        | 0.89        | 0.92        | 0.94        | 0.96       | 0.98       | <b>1.0</b> | <b>1.0</b> | <b>1.0</b> | <b>1.0</b> |  |
| $n \geq 3$       | 0.01  | 0.66       | 0.75        | 0.81        | 0.85        | 0.88        | 0.92        | 0.94        | 0.96        | 0.98       | <b>1.0</b> | <b>1.0</b> | <b>1.0</b> | <b>1.0</b> | <b>1.0</b> |  |
| $n \geq 4$       | 0.01  | 0.68       | 0.77        | 0.83        | 0.87        | 0.91        | 0.93        | <b>0.96</b> | 0.98        | 0.99       | <b>1.0</b> | <b>1.0</b> | <b>1.0</b> | <b>1.0</b> | <b>1.0</b> |  |
| $n \geq 5$       | 0.01  | <b>0.7</b> | <b>0.79</b> | <b>0.84</b> | <b>0.88</b> | <b>0.92</b> | <b>0.94</b> | <b>0.96</b> | <b>0.99</b> | <b>1.0</b> | <b>1.0</b> | <b>1.0</b> | <b>1.0</b> | <b>1.0</b> | <b>1.0</b> |  |

Table 4. Granular risk-coverage data for VQAv2 with ALBEF as  $f_{BB}$ .

## A. Detailed Risk-Coverage Data

In Tabs. 1 to 4, we show more granular risk-coverage curves across all three evaluated datasets and both black-box models.

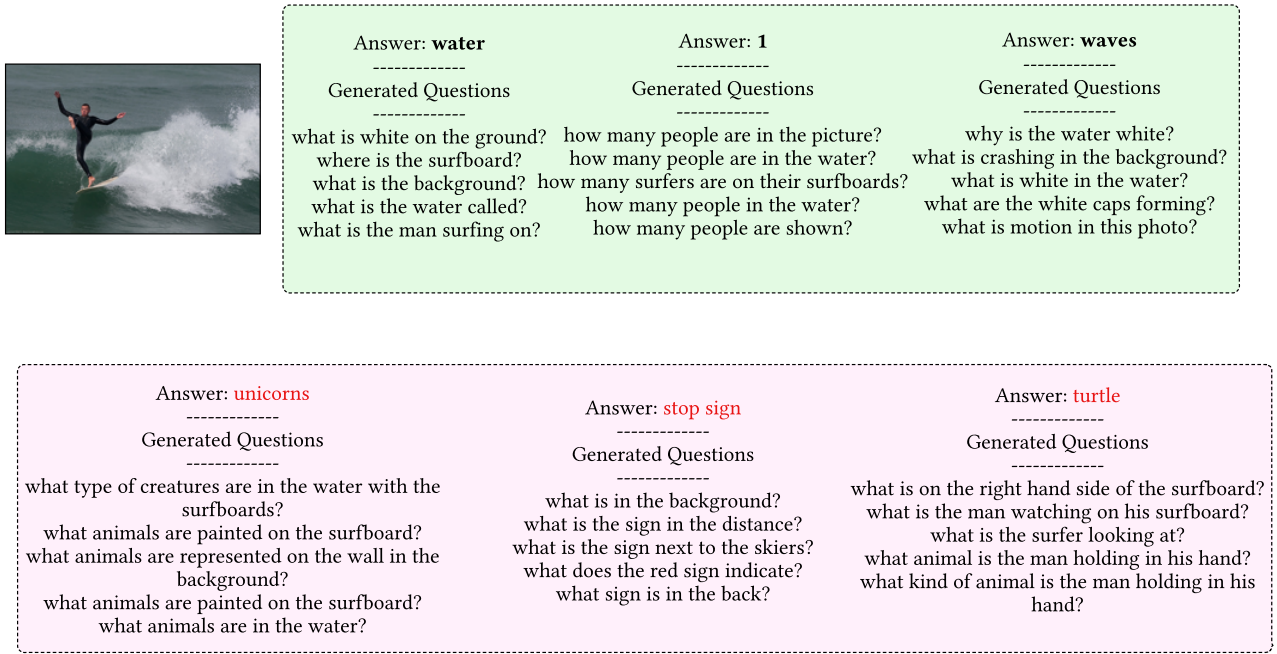

Figure 1. The rephrasing generator  $f_{VQG}$  can hallucinate questions that imagine not present in the context of the image.

## B. Inference Details

For both BLIP and ALBEF, we follow the original inference procedures. Both models have an encoder-decoder architecture and VQA is treated as a text-to-text task. We use the rank-classification approach [1] to allow the autoregressive decoder of the VLM to predict an answer for a visual question. Concretely, let  $\mathcal{A} = \{a_1, a_2, a_3, \dots, a_k\}$  be a list of length  $k$  for a dataset consisting of the most frequent ground-truth answers. These answer lists are standardized and distributed by the authors of the datasets themselves. We use the standard answer lists for each dataset. Next, let  $v, q$  be a visual question pair and let  $f_{BB}$  be a VQA model. Recall that  $f_{BB}$  is a language model defining a distribution  $p(a|q, v)$ , and is thus able to assign a score to each  $a_i \in \mathcal{A}$ . We take the highest probability  $a_k$

$$\max_{a_k \in \mathcal{A}} f_{BB}(v, q, a_k) = \max_{a_k \in \mathcal{A}} p(a_k|v, q) \quad (1)$$

as the predicted answer for a question. This is effectively asking the model to rank each of the possible answer candidates, turning the open-ended VQA task into a very large multiple choice problem. Note that the highest probability  $a_k \in \mathcal{A}$  is *not* necessarily the answer that would be produced by  $f_{BB} \sim p(a|v, q)$  in an unconstrained setting such as stochastic decoding. However, for consistency with previous work, we use the rank classification approach.

Visual question answering is thus treated differently when using large autoregressive vision-language models compared to non-autoregressive models. In traditional approaches, VQA is treated as a classification task, and a standard approach used in older, non-autoregressive vision-language models such as ViLBERT [3] is to train a MLP with a cross-entropy loss with each of the possible answers as a class.

## C. Hallucinations

We describe a peculiar mode of the rephrasing generator  $f_{VQG}$  in this section. When an answer is out-of-context for a given image, the rephrasing generator  $f_{VQG}$  will generate questions premised on the out-of-context answer. For example, in Fig. 1, we show that if an out-of-context answer such as “unicorn” for the surfing image in Fig. 1 is provided to  $f_{VQG}$  for cycle-consistent rephrasing generation,  $f_{VQG}$  will generate questions such as “what animals are in the water”, assuming that there are unicorns in the water, though this is implausible. A more correct question would have been something such as “what

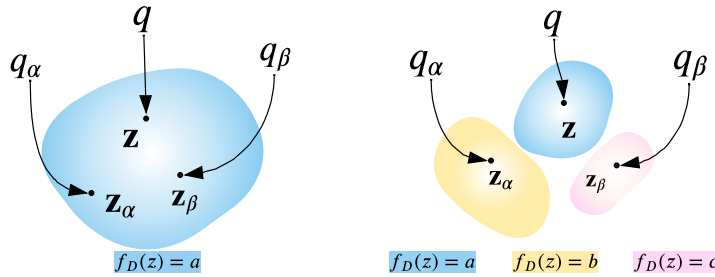

Figure 2. See Suppl. D for an explanation of the figure.

animals are not present?” A likely reason  $f_{VQG}$  cannot handle these cases well is because  $f_{VQG}$  is trained on a VQA dataset to approximate  $p(q|v, a)$ , and traditional VQA datasets have very few counterfactual questions such as these.

This is not specific to the  $f_{VQG}$  used in our framework, and should apply to any question generator trained in this manner. It does reveal that even large VLMs pretrained on a massive amount of image-text pairs have a superficial understanding of counterfactuals, and possibly other properties of language.

### D. Are the rephrasings really rephrasings?

As visible in ??, some of the rephrasings are not literally rephrasings of the original question. It may be more correct to call the rephrasings pseudo-rephrasings, in the same way that generated labels are referred to as pseudolabels in the semi-supervised learning literature [2]. However, the pseudo-rephrasings seem to be *good enough* that inconsistency over the pseudo-rephrasings indicates potentially unreliable predictions from  $f_{BB}$ .

Why does this work? Decompose  $f_{BB}$  as  $f_{BB} = f_D(f_E(v, q))$ , where  $f_E(v, z) = \mathbf{z}$  is the encoder that maps a visual question pair  $v, q$  to a dense representation  $\mathbf{z}$ , and  $f_D(\mathbf{z}) = a$  is the decoder that maps the dense representation  $\mathbf{z}$  to an answer. For two rephrasings  $q_\alpha, q_\beta$  of a question  $q$ , the model will be consistent over the rephrasings if all the rephrasings are embedded onto a subset of the embedding space that  $f_D$  assigns the same answer  $a$ . This is the situation we depict on the left side of Fig. 2.

On the other hand, if  $q_\alpha$  and  $q_\beta$  are embedded into parts of the embedding space that  $f_D$  assigns them different answers, the answers will not be consistent (right side of Fig. 2). Thus, whether a  $q_\alpha, q_\beta$  are linguistically valid rephrasings does not matter so much as if  $q_\alpha, q_\beta$  *should* technically have the same answer as the original question  $q$ . Of course, it is true that the answer to a linguistically valid rephrasing should be the same as the answer to the question being rephrased. However, for any question, there are many other questions that have the same answer but are *not* rephrasings of the original question.

### E. Calibration

The confidence scores in ???? are the raw scores from the logits of the VQA model, in this case BLIP. Recall that the models under consideration are autoregressive models that approximate a probability distribution  $p(a|v, q)$ , where  $a$  can take on an infinite number of values — the model must be able to assign a score to any natural language sentence. The raw distribution of confidence scores is clearly truncated in the sense that all scores appear to lie in the interval  $[0, 0.07]$ . We apply temperature scaling [4] to assess how well the confidence scores are calibrated. In temperature scaling, the logits of a model are multiplied by a parameter  $\tau$ . This is rank-preserving, and yields confidence scores that are more directly interpretable. In our case, we can use it to rescale the model logits into the interval  $[0, 1]$  and analyze the *Adaptive Calibration Error* [5] of the model’s predictions. We grid search the  $\tau$  that minimizes the Adaptive ECE directly on the model predictions, and show the results in Tabs. 5 to 7. The Adaptive Calibration Error is lowest on the in-distribution dataset, highest on the adversarial dataset, and second highest on the out-of-distribution dataset. Notably, the model is systematically overconfident on adversarial samples, but not on out-of-distribution samples. This suggests that calibration is not the *only* problem in selective prediction.

### F. More Rephrasings Examples

We show more examples of generated rephrasings by Fig. 3.

| percentile | Raw Confidence | Accuracy | Scaled Confidence | Error |
|------------|----------------|----------|-------------------|-------|
| 0          | 0.020          | 0.477    | 0.390             | 0.087 |
| 10         | 0.022          | 0.507    | 0.430             | 0.077 |
| 20         | 0.024          | 0.540    | 0.473             | 0.067 |
| 30         | 0.026          | 0.573    | 0.522             | 0.051 |
| 40         | 0.029          | 0.604    | 0.577             | 0.026 |
| 50         | 0.032          | 0.647    | 0.643             | 0.004 |
| 60         | 0.036          | 0.699    | 0.723             | 0.024 |
| 70         | 0.041          | 0.766    | 0.819             | 0.053 |
| 80         | 0.047          | 0.831    | 0.934             | 0.104 |
| 90         | 0.054          | 0.909    | 1.000             | 0.091 |

Table 5. Calibration of BLIP on OK-VQA. For scaling, a temperature of 19.9 is used.

| percentile | Raw Confidence | Accuracy | Scaled Confidence | Error |
|------------|----------------|----------|-------------------|-------|
| 0          | 0.042          | 0.837    | 0.841             | 0.004 |
| 10         | 0.047          | 0.898    | 0.926             | 0.028 |
| 20         | 0.051          | 0.938    | 1.000             | 0.062 |
| 30         | 0.055          | 0.968    | 1.000             | 0.032 |
| 40         | 0.058          | 0.984    | 1.000             | 0.016 |
| 50         | 0.060          | 0.994    | 1.000             | 0.006 |
| 60         | 0.062          | 0.998    | 1.000             | 0.002 |
| 70         | 0.064          | 0.999    | 1.000             | 0.001 |
| 80         | 0.065          | 1.000    | 1.000             | 0.000 |
| 90         | 0.065          | 0.999    | 1.000             | 0.001 |

Table 6. Calibration of BLIP on VQAv2. For scaling, a temperature of 19.3 is used.

| percentile | Raw Confidence | Accuracy | Scaled Confidence | Error |
|------------|----------------|----------|-------------------|-------|
| 0          | 0.032          | 0.430    | 0.637             | 0.206 |
| 10         | 0.035          | 0.472    | 0.703             | 0.231 |
| 20         | 0.039          | 0.510    | 0.769             | 0.259 |
| 30         | 0.042          | 0.547    | 0.834             | 0.287 |
| 40         | 0.045          | 0.580    | 0.897             | 0.317 |
| 50         | 0.048          | 0.601    | 0.956             | 0.355 |
| 60         | 0.051          | 0.618    | 1.000             | 0.382 |
| 70         | 0.055          | 0.636    | 1.000             | 0.364 |
| 80         | 0.058          | 0.655    | 1.000             | 0.345 |
| 90         | 0.062          | 0.693    | 1.000             | 0.307 |

Table 7. Calibration of BLIP on AdvQA. For scaling, a temperature of 12.5 is used.

## References

- [1] Tom B. Brown, Benjamin Mann, Nick Ryder, Melanie Subbiah, Jared Kaplan, Prafulla Dhariwal, Arvind Neelakantan, Pranav Shyam, Girish Sastry, Amanda Askell, Sandhini Agarwal, Ariel Herbert-Voss, Gretchen Krueger, T. J. Henighan, Rewon Child, Aditya Ramesh, Daniel M. Ziegler, Jeff Wu, Clemens Winter, Christopher Hesse, Mark Chen, Eric Sigler, Mateusz Litwin, Scott Gray, Benjamin Chess, Jack Clark, Christopher Berner, Sam McCandlish, Alec Radford, Ilya Sutskever, and Dario Amodei. Language models are few-shot

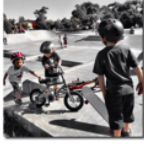

Answer: bicycle

Original Question: What are the boys pushing up the ramp?

Rephrasings

what is the boy riding on?  
what is the boy riding on?  
what is the little boy riding on?  
what is the child riding?  
what is the boy riding?

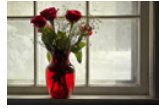

Answer: 5

Original Question: How many roses does the vase have?

Rephrasings

how many roses are there?  
how many flowers are in the vase?  
how many roses are in the vase?  
how many roses?  
how many roses are in the vase?

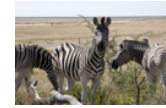

Answer: lot

Original Question: How many stripes does the zebra in the middle have?

Rephrasings

how many stripes does the front zebra have?  
how many stripes are there?  
how many lines are on the zebras?  
how many stripes does the animal in the background have?  
how many stripes does the front zebra have?

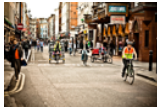

Answer: no entry or 1 way

Original Question: What is the meaning of the red sign with the white strip?

Rephrasings

what does the street sign in the middle of the picture mean?  
what do the signs mean?  
what does the street sign mean?  
what does the street sign say?  
what does the street sign say?

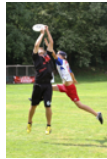

Answer: frisbee

Original Question: What are those two reaching for?

Rephrasings

what is the guy catching?  
what game is the man playing?  
what is the woman in the red shirt trying to catch?  
what are the men playing?  
what is the man in the red shorts trying to catch?

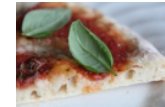

Answer: spinach

Original Question: What is the green leaf that is on top of the pizza?

Rephrasings

what kind of leaves are on the pizza?  
what vegetable is on this pizza?  
what is the green stuff on the pizza?  
what are the green objects on the pizza?  
what type of vegetables are on the pizza?

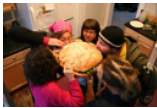

Answer: big sandwich

Original Question: What type of food are the people eating?

Rephrasings

why is she holding the sandwich in her hands?  
what is the woman eating?  
what is the little girl holding?  
what is she making?  
why are the people hungry?

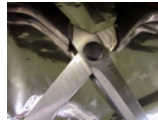

Answer: scissors

Original Question: What is this object, please?

Rephrasings

what is the object on the table?  
what tool is being used?  
what tool is this?  
what are the scissors being used for?  
what is this object?

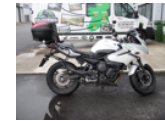

Answer: bmw

Original Question: What make is the bike?

Rephrasings

what make is the motorcycle?  
what brand of motorcycle?  
what make is this bike?  
what brand of bike is this?  
what brand is the bike?

Figure 3. More examples of generated rephrasings.

learners. *ArXiv*, abs/2005.14165, 2020. 3

- [2] Hong Liu, Jianmin Wang, and Mingsheng Long. Cycle self-training for domain adaptation. In *Neural Information Processing Systems*, 2021. 4
- [3] Jiasen Lu, Dhruv Batra, Devi Parikh, and Stefan Lee. Vilbert: Pretraining task-agnostic visiolinguistic representations for vision-and-language tasks. In *Neural Information Processing Systems*, 2019. 3
- [4] Alexandru Niculescu-Mizil and Rich Caruana. Predicting good probabilities with supervised learning. In *Proceedings of the 22nd International Conference on Machine Learning*, page 625–632, New York, NY, USA, 2005. Association for Computing Machinery. 4
- [5] Jeremy Nixon, Michael W. Dusenberry, Linchuan Zhang, Ghassen Jerfel, and Dustin Tran. Measuring calibration in deep learning. *ArXiv*, abs/1904.01685, 2019. 4
